# Supplementary material
Source: MDPI journal article supplement (https://www.mdpi.com/1999-4907/10/6/520)

Supplementary Materials for

# Exploring the Concept of Lineage Diversity across North American Forests

Kyle G. Dexter, Ricardo A. Segovia and Andy R. Griffiths.

correspondence to: [kyle.dexter@ed.ac.uk](mailto:kyle.dexter@ed.ac.uk)

**This file includes:**

**Table S1** Species added to the molecular phylogeny

**Table S2** Descriptions of the major evolutionary groups in the tree flora of the contiguous United States

**Figure S1** Clustering validation (Elbow plot)

**Table S1.** Species added to the molecular phylogeny in this study, because they were present in the FIA dataset, but absent in the study of Ma *et al.* 2016. The position is represented in relation to the two most closely related species according to the cited reference.

|    | <b>Species</b>              | <b>Position</b>                                                      | <b>Reference</b>          |
|----|-----------------------------|----------------------------------------------------------------------|---------------------------|
| 1  | <i>Crataegus crus-galli</i> | ( <i>C. saligna</i> ( <i>C. crus-galli</i> , <i>C. mollis</i> ))     | Potter et al. 2007        |
| 2  | <i>Crataegus mollis</i>     | ( <i>C. saligna</i> ( <i>C. crus-galli</i> , <i>C. mollis</i> ))     | Potter et al. 2007        |
| 3  | <i>Pinus arizonica</i>      | ( <i>P. arizonica</i> , <i>P. ponderosa</i> ))                       | Gernandt et. al 2009      |
| 4  | <i>Pinus remota</i>         | ( <i>P.cembroides</i> , <i>P. remota</i> ))                          | Gernandt et al. 2005      |
| 5  | <i>Prosopis glandulosa</i>  | ( <i>P. juliflora</i> ( <i>P. glandulosa</i> , <i>P. velutina</i> )) | Bessega et al. 2006       |
| 6  | <i>Prosopis velutina</i>    | ( <i>P. juliflora</i> ( <i>P.glandulosa</i> , <i>P. velutina</i> ))  | Bessega et al. 2006       |
| 7  | <i>Quercus buckleyi</i>     | ( <i>Q. rubra</i> , <i>Q. buckleyii</i> )                            | Hipp et al. 2018          |
| 8  | <i>Quercus margarettae</i>  | ( <i>Q. margarettae</i> , <i>Q. similis</i> , <i>Q. stellata</i> )   | Hipp et al. 2018          |
| 9  | <i>Quercus minima</i>       | ( <i>Q. minima</i> , <i>Q. virginiana</i> ))                         | Hipp et al. 2018          |
| 10 | <i>Quercus pagoda</i>       | ( <i>Q. falcata</i> , <i>Q. pagoda</i> )                             | Hipp et al. 2018          |
| 11 | <i>Quercus prinoides</i>    | ( <i>Q. prinoides</i> , <i>Q. muehlenbergii</i> )                    | Hipp et al. 2018          |
| 12 | <i>Quercus similis</i>      | ( <i>Q. margarettae</i> , <i>Q. similis</i> , <i>Q. stellata</i> )   | Hipp et al. 2018          |
| 13 | <i>Salix xsepulcralis</i>   | ( <i>S. xsepulcralis</i> (Section Longfoliaea))                      | Lauron-Moreau et al. 2015 |

**Table S2.** Descriptions of the major evolutionary groups in the tree flora of the contiguous United States as determined by k-means clustering of over 13,000 tree assemblages based on their shared evolutionary history.

| <b>Group</b>    | <b>Geography</b>                                                                               | <b>Climate</b>                                                                                 | <b>Top 5 Indicator species and other notable indicators</b>                                                                                                                                                                | <b>Comments</b>                                                                                                                                            |
|-----------------|------------------------------------------------------------------------------------------------|------------------------------------------------------------------------------------------------|----------------------------------------------------------------------------------------------------------------------------------------------------------------------------------------------------------------------------|------------------------------------------------------------------------------------------------------------------------------------------------------------|
| Wet West        | Along the west coast and the west flank of the Sierra Nevada, scattered across Rockies         | Broad distribution across rainfall regime, occurring at cooler temperatures                    | 1. <i>Pseudotsuga menziesii</i> ,<br>2. <i>Thuja plicata</i> ,<br>3. <i>Tsuga heterophylla</i> ,<br>4. <i>Alnus rubra</i> ,<br>5. <i>Acer macrophyllum</i> ;<br><i>Abies</i> spp.,<br><i>Arbutus menziesii</i>             | The only group in west to occur above 1000 mm MAP, but also occurs in dry areas. Includes temperate rainforests of northwest, but also throughout Rockies. |
| High West       | At northern latitudes, scattered through Rockies and east side of Cascade range                | Cold and dry conditions                                                                        | 1. <i>Pinus contorta</i> ,<br>2. <i>Abies lasiocarpa</i> ,<br>3. <i>Picea engelmannii</i> ,<br>4. <i>Pinus flexilis</i> ,<br>5. <i>Larix occidentalis</i>                                                                  | Occurs under coldest conditions of any group. Found at lower elevations as latitude increases. Very few angiosperms.                                       |
| Dry West        | Scattered throughout the Rockies and on the east flank of the Sierra Nevada mountains.         | From warm to cool conditions, occurring under drier conditions on average than Wet West group. | 1. <i>Pinus ponderosa</i> ,<br>2. <i>Juniperus scopularum</i> ,<br>3. <i>Juniperus occidentalis</i> ,<br>4. <i>Juniperus deppeana</i> ,<br>5. <i>Juniperus osteosperma</i> ;<br>Many <i>Quercus</i> and <i>Pinus</i> spp., | <i>Quercus</i> spp. are the only non-gymnosperm species to regularly occur across this group. Predominantly species of open habitat.                       |
| Northern Plains | Found across the Great Plains, but more predominant further north, also extending into Midwest | Found under cooler conditions on average than Southern Plains group, and uniformly             | 1. <i>Quercus macrocarpa</i> ,<br>2. <i>Sapindus saponaria</i> ,<br>3. <i>Gymnocladus dioica</i> ,<br>4. <i>Ehretia anacua</i> ,<br>5. <i>Crataegus crus-</i>                                                              | Least 'cohesive' group in terms of silhouette analysis and low indicator values for indicator species. Many of the indicators                              |

|                 |                                                                                                                                          |                                                                                                                |                                                                                                                                                                                                                                                                                       |                                                                                                                                            |
|-----------------|------------------------------------------------------------------------------------------------------------------------------------------|----------------------------------------------------------------------------------------------------------------|---------------------------------------------------------------------------------------------------------------------------------------------------------------------------------------------------------------------------------------------------------------------------------------|--------------------------------------------------------------------------------------------------------------------------------------------|
|                 | states from Illinois to Ohio.                                                                                                            | occurs at low elevations.                                                                                      | <i>galli</i>                                                                                                                                                                                                                                                                          | favour calcareous soils, but also include floodplain spp.                                                                                  |
| Southern Plains | Texas and scattered areas of Arizona, New Mexico and more northern states                                                                | Occurs under the hottest and driest conditions of any group.                                                   | 1. <i>Prosopis glandulosa</i> ,<br>2. <i>Juniperus ashei</i> ,<br>3. <i>Juniperus pinchotii</i> ,<br>4. <i>Juniperus coahuilensis</i> ,<br>5. <i>Quercus buckleyi</i> ;<br><i>Condalia hookeri</i> ,<br><i>Vachellia farnesiana</i>                                                   | Notable presence of tree species that also occur in tropical arid regions. Many drought tolerant indicator species.                        |
| Northeast       | Main evolutionary group in the Great Lakes region and the northeast from New York and upwards.                                           | Occurs under coldest conditions of any of the eastern groups. Also drier on average than other eastern groups. | 1. <i>Betula papyrifera</i><br>2. <i>Abies balsamea</i><br>3. <i>Betula alleghaniensis</i><br>4. <i>Pinus strobus</i><br>5. <i>Fraxinus nigra</i> ;<br><i>Thuja occidentalis</i> ,<br><i>Picea</i> spp., <i>Populus</i> spp., <i>Tsuga canadensis</i>                                 | A diverse mix of gymnosperm and angiosperm lineages.                                                                                       |
| Appalachian     | Southern Appalachian mountains of North Carolina north to include much of Pennsylvania and scattered across the Midwest                  | Intermediate in rainfall and temperature between the Southeast and Northeast groups                            | 1. <i>Sassafras albidum</i> ,<br>2. <i>Robinia psuedoacacia</i> ,<br>3. <i>Quercus rubra</i> ,<br>4. <i>Fraxinus Americana</i> ,<br>5. <i>Carya ovata</i> ;<br><i>Liriodendron tulipifera</i> , <i>Prunus serotina</i> , <i>Acer saccharinum</i> ,<br><i>Castanea dentata</i>         | Restricted to high elevations at more southern latitudes. Across elevations further north and interdigitated with other groups in Midwest. |
| Southeast       | Found across the southeastern states inland of the Coastal Plain, but also extending westwards into Arkansas, Missouri and eastern Texas | This group is intermediate in precipitation and temperature between the Coastal Plain and Appalachian groups   | 1. <i>Ulmus alata</i> ,<br>2. <i>Juniperus virginiana</i> ,<br>3. <i>Pinus echinata</i> ,<br>4. <i>Quercus stellata</i> ,<br>5. <i>Carya alba</i> ;<br><i>Cornus florida</i> ,<br><i>Cercis canadensis</i> ,<br><i>Platanus occidentalis</i> , many <i>Quercus</i> , <i>Carya</i> and | The most geographically widespread of the eastern groups and representing more grid cells than any other group in the database.            |

---

| <i>Celtis</i> spp. |                                                                                                            |                                                                   |                                                                                                                                                                                                                                                                                   |                                                                                                                                                                    |
|--------------------|------------------------------------------------------------------------------------------------------------|-------------------------------------------------------------------|-----------------------------------------------------------------------------------------------------------------------------------------------------------------------------------------------------------------------------------------------------------------------------------|--------------------------------------------------------------------------------------------------------------------------------------------------------------------|
| Coastal Plain      | Along the Gulf Coast, including most of Florida and up the Atlantic Coast to New Jersey and Massachussetts | Uniformly at low elevations, occurs under warm and wet conditions | 1. <i>Pinus elliotii</i> ,<br>2. <i>Persea borbonia</i> ,<br>3. <i>Quercus laurifolia</i> ,<br>4. <i>Taxodium distichum</i> ,<br>5. <i>Quercus virginiana</i> ;<br><i>Gordonia lasianthus</i> ,<br><i>Sabal palmetto</i> ,<br><i>Nyssa aquatica</i> ,<br>Many <i>Quercus</i> spp. | Warmest conditions of eastern groups. Including many species from tropical and early diverging angiosperm lineages. Many of the indicators like swampy conditions. |

---

**Figure S1.** Elbow plot showing the total sum of within group sum of squares versus the number of groups. Lower values mean more variation explained by groups.

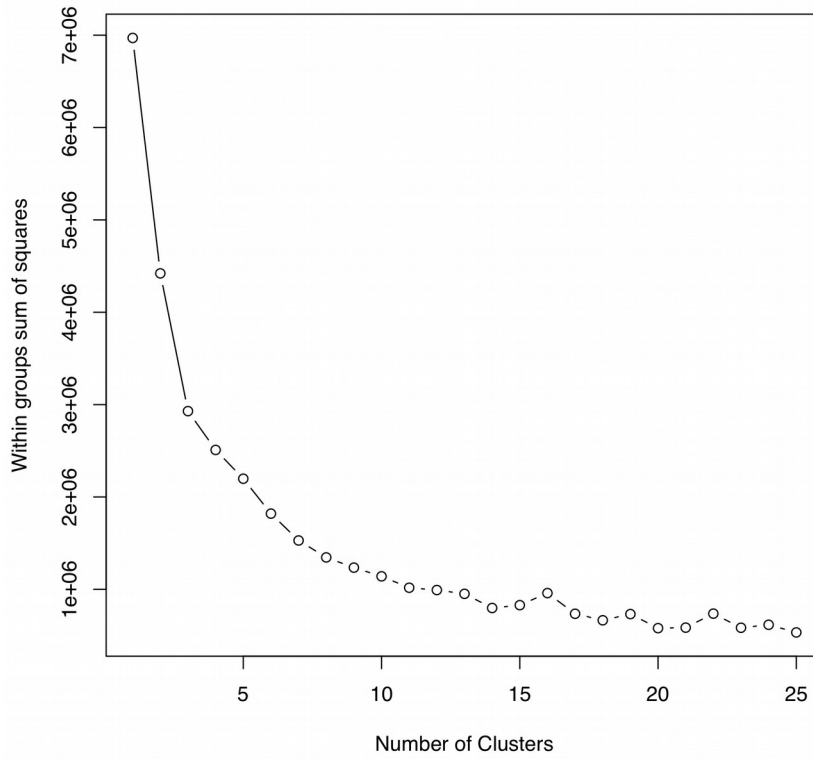

Supplement: s1 [file s1]
